# Supplementary material for: Purification of Mg from extremely low-Mg felsic rocks for isotopic ratio determination by MC-ICP-MS
Source: Royal Society of Chemistry journal article supplement (doi:10.1039/d1ja00359c), 2022-01-01

## **Purification of Mg from extremely low-Mg felsic rocks for isotopic ratio determination by MC-ICP-MS**

Yang Wang (汪洋)<sup>1</sup>, Yinchu Zhang<sup>1</sup>, Xin Li<sup>1</sup>, Shan Ke<sup>1,\*</sup>, Aiyong Sun<sup>1</sup>, Ruyi Yang<sup>1</sup>,  
Weijuan Yang<sup>1</sup>, Yongsheng He<sup>1</sup>

<sup>1</sup> State Key Laboratory of Geological Processes and Mineral Resources, China University of  
Geosciences, Beijing 100083, China.

\*corresponding author: Shan Ke ([keshan@cugb.edu.cn](mailto:keshan@cugb.edu.cn))

### **Supplementary materials**

Fig. S1

Fig. S1 Elution curves of Mg for low-Mg geological reference materials in 1.5M HNO<sub>3</sub> (a) and 1M HNO<sub>3</sub> (b). The volume of eluents that recovers 50% Mg (estimated by assuming that recovered Mg of each cut is equally distributed in its volume range) varies with different cation-resin ratios  $q$  in 1.5M HNO<sub>3</sub> (c) and 1M HNO<sub>3</sub> (d). Notably, GSP-2 with a high loading amount  $\sim 35\mu\text{g}$  Mg is plotted off the major trend (d), and the reason remains not well understood.

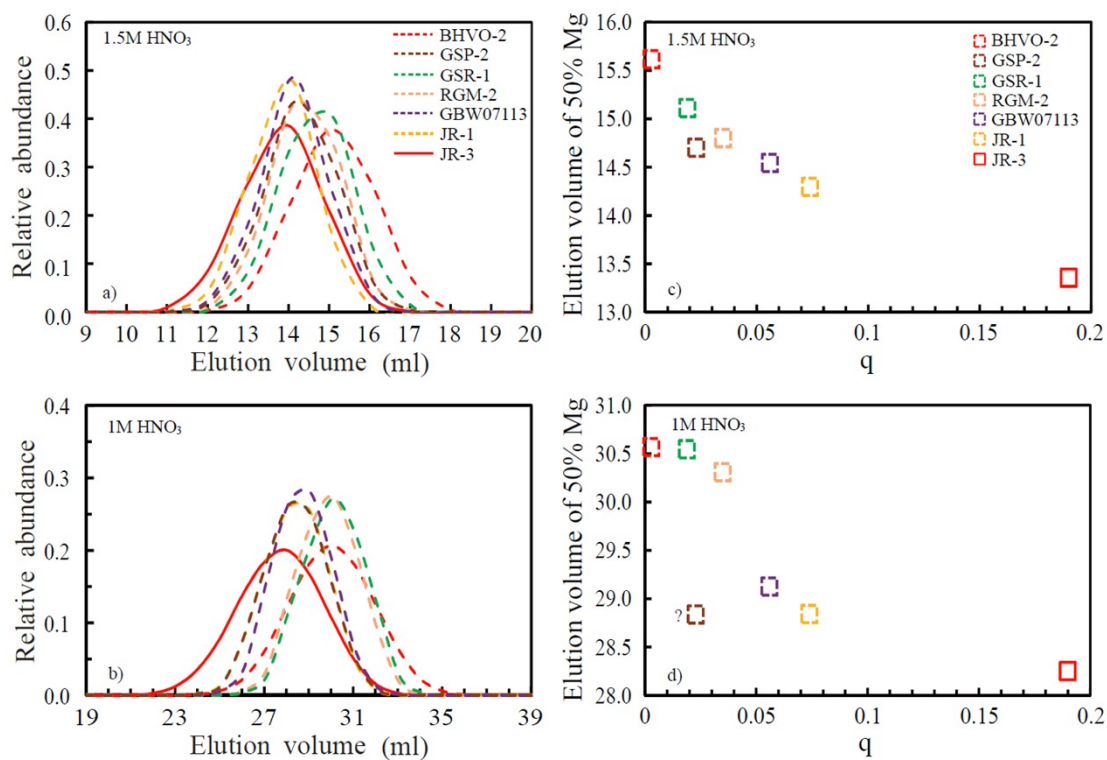

Supplement: d1ja00359c1.pdf [file d1ja00359c1.pdf]
